# Supplementary material for: Metabolic consequences of cystinuria
Source: Springer Nature journal article supplement (doi:10.1186/s12882-019-1417-8), 2019-06-20
Supplement: MOESM1 [file 16838480]

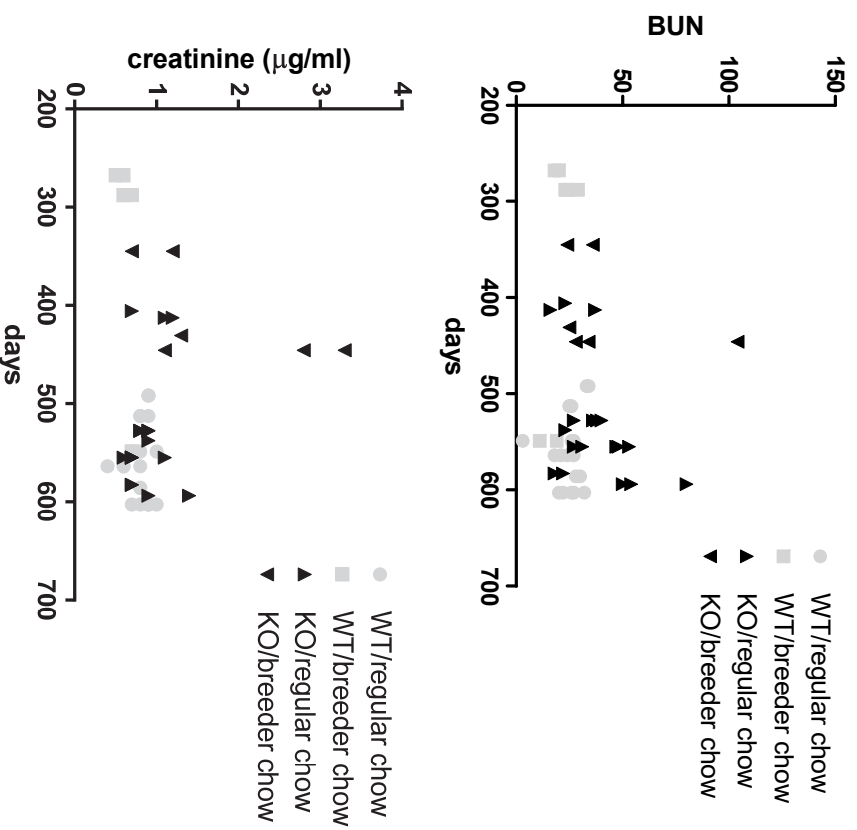

**Additional file figure legend:** Evaluation of serum BUN and creatinine in male WT or *Slc3a1*<sup>-/-</sup> mice on regular or breeder chow at a variety of ages. Each point represents a measurement from an individual mouse at that age.
